# Supplementary material
Source: publisher site journal article supplement (https://www.dovepress.com/article/370669)
Supplement: Supplementary file 1 [file get_supplementary_file.php]

# Experimental procedure for metagenomic DNA analysis of WWTP effluent.

## Effluent from WWTP

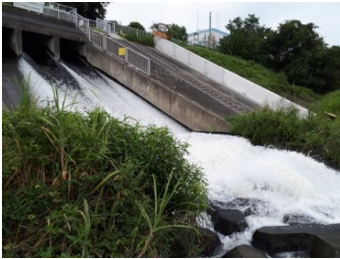

500 mL sampling  
Transport at room temperature (23°C)

Filtration within 6 hours after sample collection.

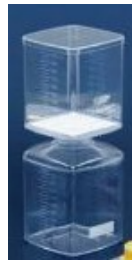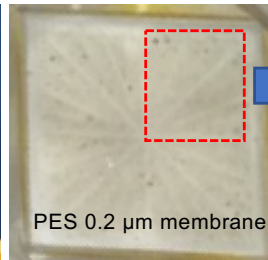

Cut to small pieces

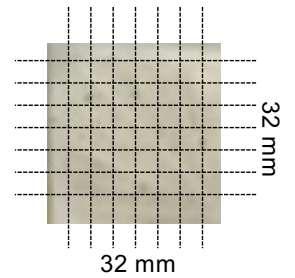

TPP Rapid Filtermax Vacuum Filtration

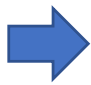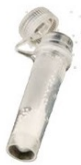

- Add 1/4 membrane into Zymoresearch BasingBeads (0.1mm/0.5mm)
- Add 800 µl Roche Bacterial lysis buffer
- Freeze at -25°C
- Thaw room temperature

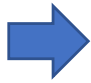

Bead-beating (1,500 rpm, 10 min)  
Geno/Grinder 2010

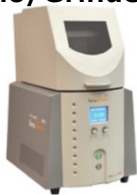

400 µL

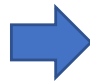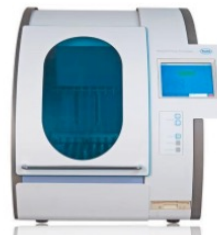

DNA purification

Roche,  
MagNa Pure Compact Isolation

(Elution: 50 µL EB)

One microliter of DNA sol. corresponds to 1.25 mL effluent DNA, if 100% recovery rate.

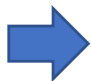

Metagenomic DNA-Seq library preparation (QIAGEN QIAseq FX DNA library kit)  
DNA sol. 2.5 µl, 4 cycle PCR enrichment.

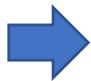

Next-Generation Sequencing  
NextSeq 500  
150-mer paired-end

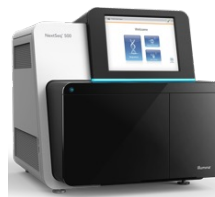

Supplementary Figure 1. Experimental procedure for metagenomic DNA analysis of WWTP effluent.

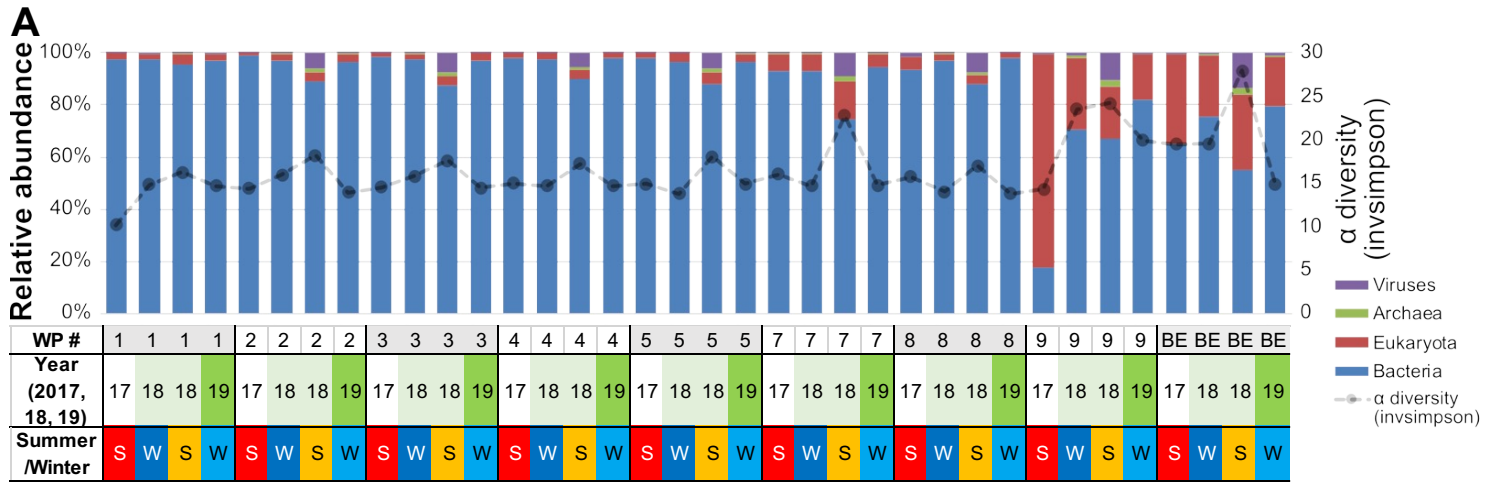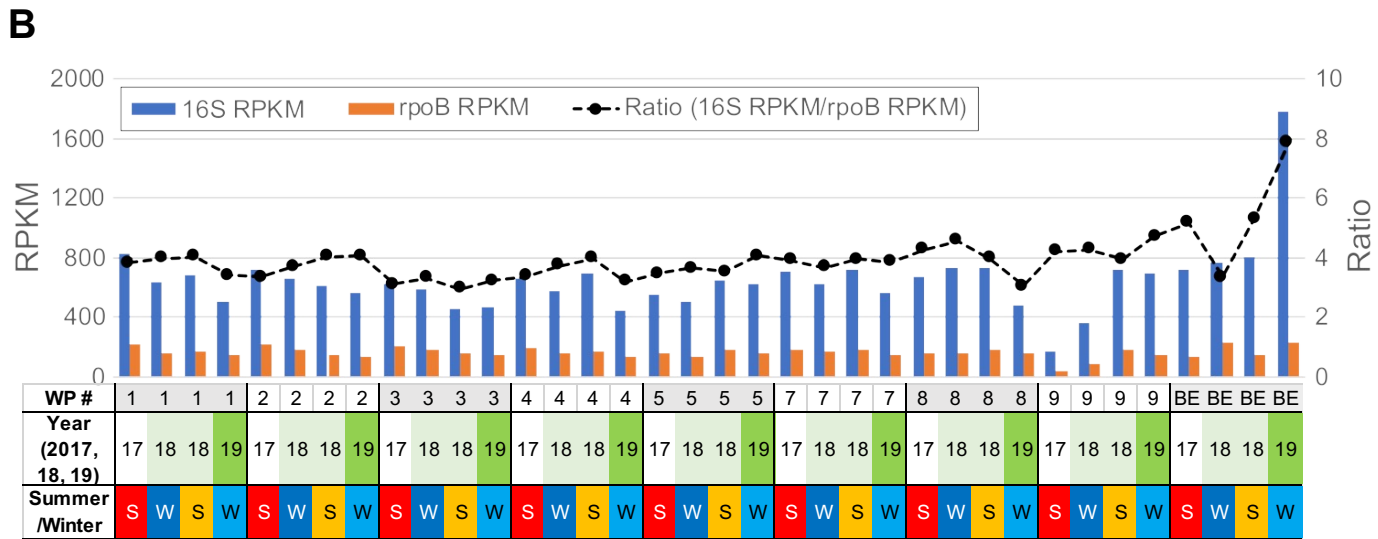

**Supplementary Figure 2.** A) Taxonomic classification of the domain rank of effluents from fresh water areas (WP1 to 8) based on the metagenomic DNA-Seq. B) Bacteria population size using RPKM normalization for 16S-rRNA genes and *rpoB* RNA polymerase  $\beta$  subunit orthologs showed no significant difference with an average 4 copies of 16S-rRNA gene for *rpoB*, suggesting that RPKM estimation is an effective approach to characterize the ARG content.

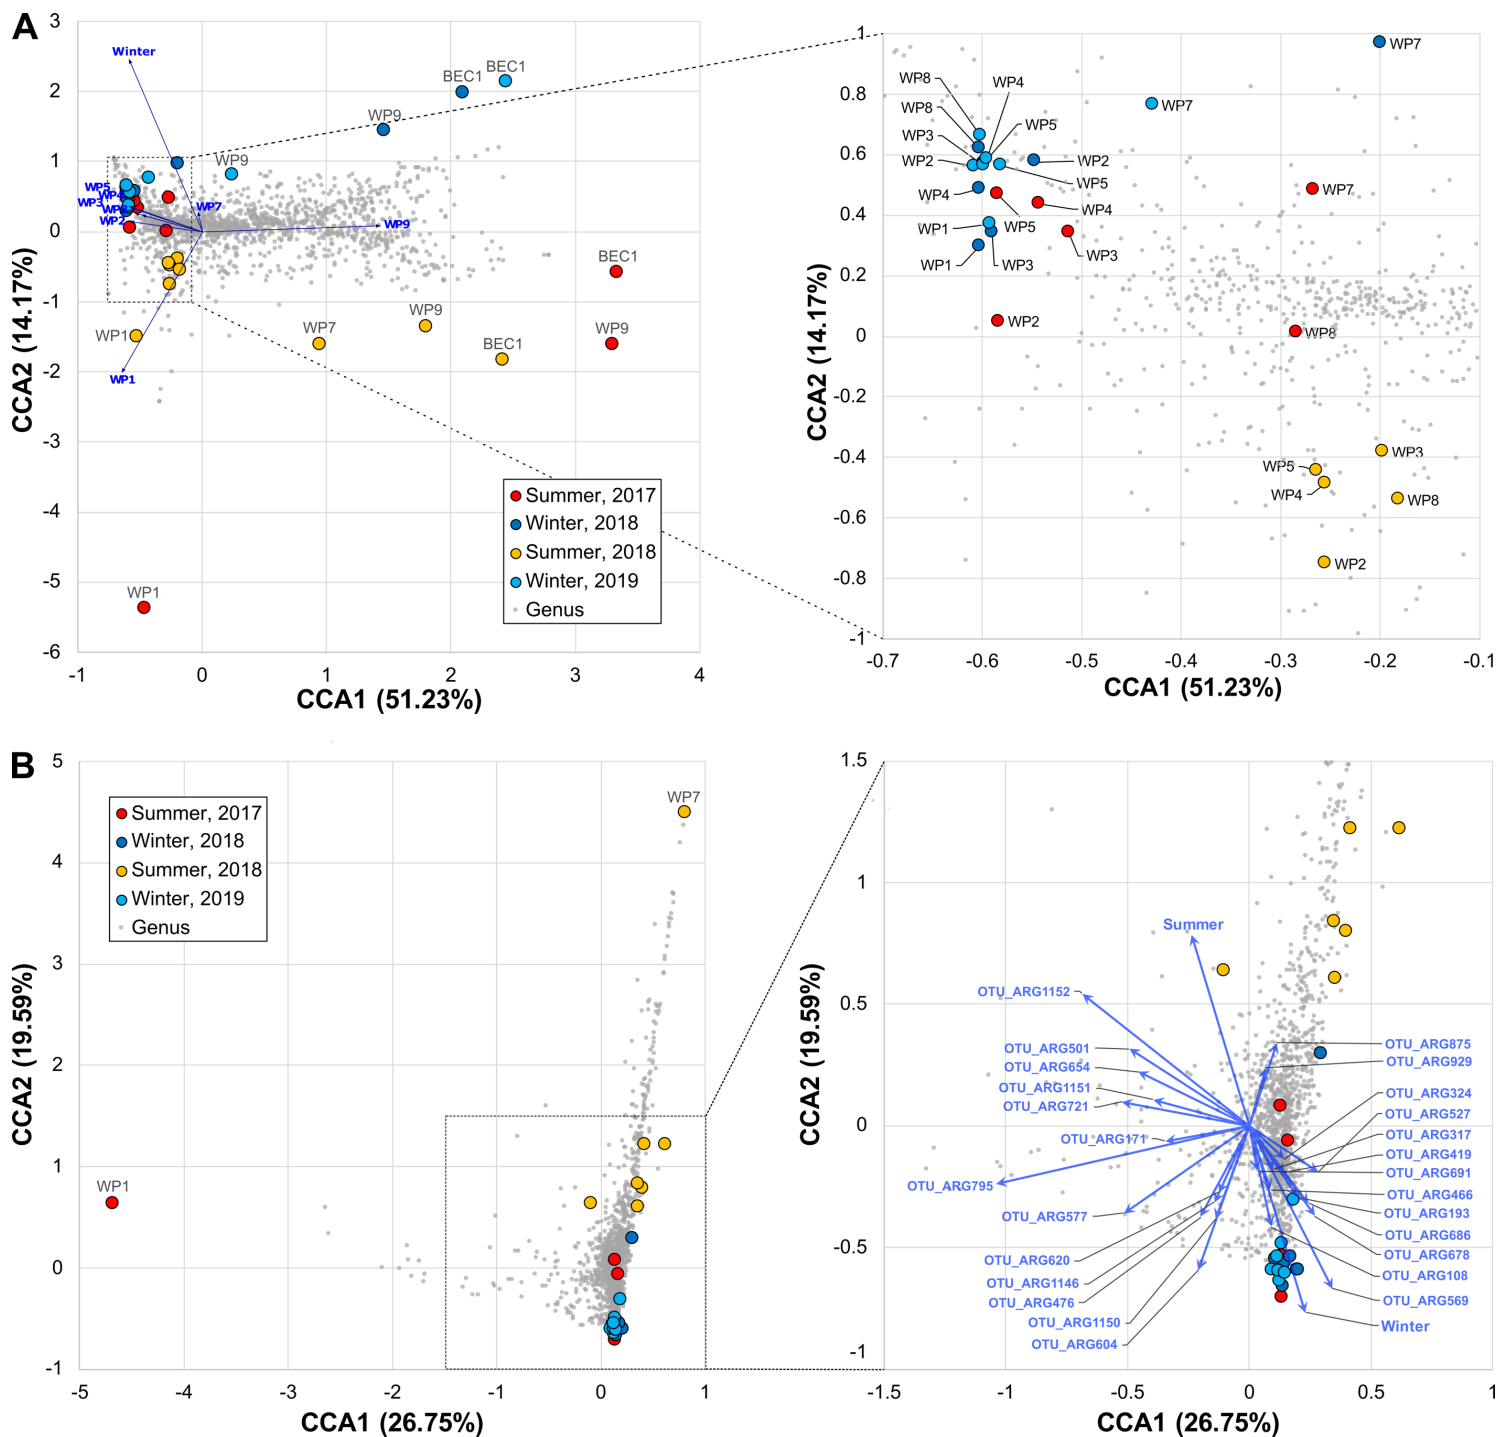

**Supplementary Figure 3. Canonical correspondence analysis (CCA) based on genus taxonomic classification.** A) CCA exhibited the season-dependent manner among wastewater treatment plants (WPs). Colored circles indicate each WP site and sampling time (see detail in Table S1). Gray circles indicate the 1603 bacterial genera that were detected among all tested WP effluents.

B) Biplot corresponding to ARGs and seasonal features (summer and winter) was included in the CCA plot. The results showed that OUT\_ARG875 and OUT\_ARG929 were positively correlated to the summer samples, while OUT\_ARG108 was correlated to the winter samples. Variables were chosen based on significance calculated from individual CCA results.

**Supplementary Table 1. Metagenomic DNA-Seq information for Effluent of WWTP and environment water samples in this study**

| Place ID                                 | Sampling site (GPS)        | Sampling date (mm/dd/yyyy) | Season (Summer/Winter) | Temperature (°C) | DNA conc. (ng/μl) | Metagenome DNA-Seq Total reads | Total RPKM of AMR genes | BioSample ID | SRA ID    |
|------------------------------------------|----------------------------|----------------------------|------------------------|------------------|-------------------|--------------------------------|-------------------------|--------------|-----------|
| <b>Wastewater treatment plant (WWTP)</b> |                            |                            |                        |                  |                   |                                |                         |              |           |
| WP1-S17                                  | 35°41'06.8"N 139°24'37.2"E | 07/10/2017                 | Summer                 | 32.1             | 4.0               | 17,471,507                     | 97.2                    | SAMD00193144 | DRR198489 |
| WP1-W18                                  | 35°41'06.8"N 139°24'37.2"E | 02/13/2018                 | Winter                 | 9.7              | 12.0              | 5,022,485                      | 93.7                    | SAMD00193145 | DRR198490 |
| WP1-S18                                  | 35°41'06.8"N 139°24'37.2"E | 08/06/2018                 | Summer                 | 34.0             | 9.7               | 3,786,852                      | 100.8                   | SAMD00193146 | DRR198491 |
| WP1-W19                                  | 35°41'06.8"N 139°24'37.2"E | 02/05/2019                 | Winter                 | 8.1              | 11.7              | 15,624,087                     | 90.1                    | SAMD00193147 | DRR198492 |
| WP2-S17                                  | 35°39'50.5"N 139°26'16.0"E | 07/10/2017                 | Summer                 | 32.1             | 6.4               | 12,108,247                     | 39.7                    | SAMD00193148 | DRR198493 |
| WP2-W18                                  | 35°39'50.5"N 139°26'16.0"E | 02/13/2018                 | Winter                 | 9.7              | 2.9               | 1,461,838                      | 48.1                    | SAMD00193149 | DRR198494 |
| WP2-S18                                  | 35°39'50.5"N 139°26'16.0"E | 08/06/2018                 | Summer                 | 34.0             | 1.9               | 931,653                        | 71.8                    | SAMD00193150 | DRR198495 |
| WP2-W19                                  | 35°39'50.5"N 139°26'16.0"E | 02/05/2019                 | Winter                 | 8.1              | 7.3               | 9,309,728                      | 148.0                   | SAMD00193151 | DRR198496 |
| WP3-S17                                  | 35°40'06.1"N 139°25'40.0"E | 07/10/2017                 | Summer                 | 32.1             | 9.4               | 13,370,239                     | 50.8                    | SAMD00193152 | DRR198497 |
| WP3-W18                                  | 35°40'06.1"N 139°25'40.0"E | 02/13/2018                 | Winter                 | 9.7              | 7.0               | 2,187,631                      | 84.1                    | SAMD00193153 | DRR198498 |
| WP3-S18                                  | 35°40'06.1"N 139°25'40.0"E | 08/06/2018                 | Summer                 | 34.0             | 7.7               | 3,160,162                      | 35.4                    | SAMD00193154 | DRR198499 |
| WP3-W19                                  | 35°40'06.1"N 139°25'40.0"E | 02/05/2019                 | Winter                 | 8.1              | 13.0              | 15,381,005                     | 55.8                    | SAMD00193155 | DRR198500 |
| WP4-S17                                  | 35°39'04.9"N 139°28'52.8"E | 07/10/2017                 | Summer                 | 32.1             | 6.9               | 9,654,509                      | 71.9                    | SAMD00193156 | DRR198501 |
| WP4-W18                                  | 35°39'04.9"N 139°28'52.8"E | 02/13/2018                 | Winter                 | 9.7              | 8.1               | 3,656,160                      | 98.7                    | SAMD00193157 | DRR198502 |
| WP4-S18                                  | 35°39'04.9"N 139°28'52.8"E | 08/06/2018                 | Summer                 | 34.0             | 6.6               | 3,127,256                      | 94.4                    | SAMD00193158 | DRR198503 |
| WP4-W19                                  | 35°39'04.9"N 139°28'52.8"E | 02/05/2019                 | Winter                 | 8.1              | 12.9              | 15,700,728                     | 54.3                    | SAMD00193159 | DRR198504 |
| WP5-S17                                  | 35°39'13.8"N 139°30'45.2"E | 07/10/2017                 | Summer                 | 32.1             | 12.2              | 13,613,329                     | 74.5                    | SAMD00193160 | DRR198505 |
| WP5-W18                                  | 35°39'13.8"N 139°30'45.2"E | 02/13/2018                 | Winter                 | 9.7              | 16.0              | 6,850,264                      | 84.1                    | SAMD00193161 | DRR198506 |
| WP5-S18                                  | 35°39'13.8"N 139°30'45.2"E | 08/06/2018                 | Summer                 | 34.0             | 2.9               | 1,187,246                      | 73.3                    | SAMD00193162 | DRR198507 |
| WP5-W19                                  | 35°39'13.8"N 139°30'45.2"E | 02/05/2019                 | Winter                 | 8.1              | 4.4               | 6,552,281                      | 104.3                   | SAMD00193163 | DRR198508 |
| WP7-S17                                  | 35°33'42.9"N 139°45'11.0"E | 07/10/2017                 | Summer                 | 32.1             | 5.9               | 15,352,840                     | 69.6                    | SAMD00193164 | DRR198509 |
| WP7-W18                                  | 35°33'42.9"N 139°45'11.0"E | 02/13/2018                 | Winter                 | 9.7              | 3.6               | 2,438,058                      | 69.8                    | SAMD00193165 | DRR198510 |
| WP7-S18                                  | 35°33'42.9"N 139°45'11.0"E | 08/06/2018                 | Summer                 | 34.0             | 6.2               | 2,148,293                      | 23.0                    | SAMD00193166 | DRR198511 |
| WP7-W19                                  | 35°33'42.9"N 139°45'11.0"E | 02/05/2019                 | Winter                 | 8.1              | 7.6               | 10,567,429                     | 46.3                    | SAMD00193167 | DRR198512 |
| WP8-S17                                  | 35°37'53.8"N 139°44'45.6"E | 08/23/2017                 | Summer                 | 33.7             | 42.1              | 10,261,235                     | 129.7                   | SAMD00193168 | DRR198513 |
| WP8-W18                                  | 35°37'53.8"N 139°44'45.6"E | 02/13/2018                 | Winter                 | 9.7              | 19.6              | 7,269,472                      | 157.6                   | SAMD00193169 | DRR198514 |
| WP8-S18                                  | 35°37'53.8"N 139°44'45.6"E | 08/06/2018                 | Summer                 | 34.0             | 8.5               | 3,715,095                      | 118.0                   | SAMD00193170 | DRR198515 |
| WP8-W19                                  | 35°37'53.8"N 139°44'45.6"E | 02/05/2019                 | Winter                 | 8.1              | 47.8              | 24,567,160                     | 93.5                    | SAMD00193171 | DRR198516 |
| WP9-S17                                  | 35°37'49.9"N 139°47'02.9"E | 07/10/2017                 | Summer                 | 32.1             | 54.0              | 24,630,107                     | 3.2                     | SAMD00193172 | DRR198517 |
| WP9-W18                                  | 35°37'49.9"N 139°47'02.9"E | 02/13/2018                 | Winter                 | 9.7              | 4.1               | 3,490,194                      | 7.4                     | SAMD00193173 | DRR198518 |
| WP9-S18                                  | 35°37'49.9"N 139°47'02.9"E | 08/06/2018                 | Summer                 | 34.0             | 5.7               | 2,469,983                      | 15.3                    | SAMD00193174 | DRR198519 |
| WP9-W19                                  | 35°37'49.9"N 139°47'02.9"E | 02/05/2019                 | Winter                 | 8.1              | 1.1               | 1,713,450                      | 36.6                    | SAMD00193175 | DRR198520 |
| <b>Recreational Beach</b>                |                            |                            |                        |                  |                   |                                |                         |              |           |
| BEC1-S17                                 | 35°37'50.0"N 139°46'31.3"E | 07/10/2017                 | Summer                 | 32.1             | 98.8              | 19,083,448                     | 6.2                     | SAMD00193176 | DRR198521 |
| BEC1-W18                                 | 35°37'50.0"N 139°46'31.3"E | 02/13/2018                 | Winter                 | 9.7              | 2.8               | 2,353,547                      | 11.9                    | SAMD00193177 | DRR198522 |
| BEC1-S18                                 | 35°37'50.0"N 139°46'31.3"E | 08/06/2018                 | Summer                 | 34.0             | 40.3              | 11,585,753                     | 4.1                     | SAMD00193178 | DRR198523 |
| BEC1-W19                                 | 35°37'50.0"N 139°46'31.3"E | 02/05/2019                 | Winter                 | 8.1              | 1.8               | 1,514,954                      | 4.2                     | SAMD00193179 | DRR198524 |

RPKM, per kilobase of exon per million mapped reads.

SRA, short read archive.

Supplementary Table 2. Summary of RPKM value for operational taxonomic unit (OTU) of antimicrobial resistance

| ARG cluster ID | class          | subclass                                      | gene list                              | length | Total RPKM in all 28 samples |         |         |         |         |         |         |         |         |         |         |         |         |         |         |         |         |         |         |         |         |         |         |         |         |         |         |         |         |         |         |         |          |          |          |          |      |      |      |
|----------------|----------------|-----------------------------------------------|----------------------------------------|--------|------------------------------|---------|---------|---------|---------|---------|---------|---------|---------|---------|---------|---------|---------|---------|---------|---------|---------|---------|---------|---------|---------|---------|---------|---------|---------|---------|---------|---------|---------|---------|---------|---------|----------|----------|----------|----------|------|------|------|
|                |                |                                               |                                        |        | WP1-170                      | WP1-170 | WP1-185 | WP1-190 | WP2-170 | WP2-170 | WP2-185 | WP2-190 | WP3-170 | WP3-170 | WP3-185 | WP3-190 | WP4-170 | WP4-170 | WP4-185 | WP4-190 | WP5-170 | WP5-170 | WP5-185 | WP5-190 | WP7-170 | WP7-170 | WP7-185 | WP7-190 | WP8-170 | WP8-170 | WP8-185 | WP8-190 | WP9-170 | WP9-170 | WP9-185 | WP9-190 | REC1-170 | REC1-170 | REC1-185 | REC1-190 |      |      |      |
| OTU_ARG57      | AMINOGLYCOSIDE | STREPTOMYCIN                                  | STR1Faa44aa, aadA11, aph37-1b          | 909    | 88.15                        | 4.62    | 1.98    | 2.65    | 1.04    | 1.37    | 2.27    | 2.40    | 2.41    | 2.40    | 4.54    | 2.82    | 2.44    | 3.67    | 3.93    | 4.96    | 1.84    | 2.69    | 2.74    | 1.89    | 3.23    | 3.25    | 3.63    | 0.52    | 2.64    | 3.79    | 4.11    | 3.89    | 3.76    | 0.00    | 0.32    | 0.91    | 1.32     | 0.00     | 0.47     | 0.19     | 0.00 |      |      |
| OTU_ARG64      | AMINOGLYCOSIDE | STREPTOMYCIN                                  | aadA2, aadA2b, aadA3, ai               | 792    | 51.40                        | 3.78    | 0.51    | 2.03    | 1.03    | 0.63    | 1.73    | 2.75    | 2.96    | 2.19    | 0.00    | 0.00    | 0.42    | 2.76    | 1.73    | 0.81    | 2.77    | 0.74    | 4.33    | 1.95    | 2.90    | 1.04    | 1.20    | 0.85    | 1.37    | 5.24    | 3.44    | 3.25    | 0.00    | 0.36    | 1.04    | 1.32    | 0.00     | 0.00     | 0.22     | 0.00     |      |      |      |
| OTU_ARG71      | AMINOGLYCOSIDE | STREPTOMYCIN                                  | aadA, aadA5                            | 789    | 50.46                        | 3.87    | 1.27    | 1.70    | 1.88    | 0.84    | 0.87    | 1.52    | 2.07    | 1.14    | 0.88    | 0.81    | 0.99    | 1.32    | 0.70    | 0.82    | 1.06    | 1.78    | 2.79    | 3.26    | 0.78    | 1.66    | 0.52    | 0.00    | 1.46    | 2.87    | 1.53    | 1.72    | 3.76    | 0.32    | 0.00    | 1.05    | 0.00     | 0.34     | 1.09     | 0.00     | 0.00 |      |      |
| OTU_ARG80      | AMINOGLYCOSIDE | STREPTOMYCIN                                  | aph37-1b                               | 804    | 39.028                       | 1.65    | 1.49    | 1.67    | 0.89    | 1.03    | 0.85    | 1.36    | 1.22    | 1.03    | 2.28    | 1.59    | 2.22    | 3.24    | 2.39    | 0.00    | 1.20    | 1.29    | 0.18    | 3.20    | 0.38    | 0.90    | 1.03    | 0.00    | 0.00    | 1.84    | 2.92    | 1.89    | 1.18    | 0.00    | 0.36    | 0.00    | 0.00     | 0.00     | 0.00     | 0.00     |      |      |      |
| OTU_ARG82      | AMINOGLYCOSIDE | STREPTOMYCIN                                  | aadA                                   | 465    | 31.91                        | 0.62    | 1.19    | 0.61    | 0.76    | 0.76    | 0.61    | 0.76    | 0.61    | 0.76    | 0.61    | 0.76    | 0.61    | 0.76    | 0.61    | 0.76    | 0.61    | 0.76    | 0.61    | 0.76    | 0.61    | 0.76    | 0.61    | 0.76    | 0.61    | 0.76    | 0.61    | 0.76    | 0.61    | 0.76    | 0.61    | 0.76    | 0.61     | 0.76     | 0.61     | 0.76     | 0.61 | 0.76 | 0.61 |
| OTU_ARG34      | AMINOGLYCOSIDE | STREPTOMYCIN                                  | aadA1, aadA1b, aadA11                  | 786    | 35.81                        | 0.88    | 0.76    | 0.00    | 0.17    | 0.53    | 3.50    | 5.55    | 2.88    | 0.48    | 1.17    | 1.22    | 0.84    | 0.80    | 2.10    | 1.64    | 0.16    | 0.00    | 1.97    | 2.42    | 0.00    | 4.52    | 0.83    | 0.15    | 0.00    | 0.49    | 1.38    | 1.41    | 0.00    | 1.15    | 0.00    | 0.00    | 0.00     | 0.00     | 0.00     | 0.00     | 0.00 | 0.00 | 0.00 |
| OTU_ARG64      | AMINOGLYCOSIDE | STREPTOMYCIN                                  | aph(6)-Ia                              | 837    | 31.91                        | 1.38    | 0.72    | 1.28    | 0.78    | 1.29    | 0.82    | 0.00    | 0.65    | 1.08    | 1.64    | 1.15    | 2.12    | 2.95    | 0.77    | 0.92    | 1.68    | 0.53    | 1.02    | 1.66    | 0.63    | 0.00    | 0.00    | 0.11    | 0.71    | 2.48    | 1.30    | 1.13    | 0.00    | 0.00    | 0.99    | 0.00    | 0.00     | 0.00     | 0.00     | 0.00     | 0.00 |      |      |
| OTU_ARG29      | AMINOGLYCOSIDE | AMIKACIN/KANAMYCIN                            | ant(4)-Ib, aac(6)-Ib, aac(6)-Ib-cr, ai | 555    | 21.01                        | 0.41    | 0.72    | 3.86    | 0.47    | 0.75    | 0.00    | 0.00    | 0.20    | 0.68    | 0.00    | 1.15    | 0.48    | 0.75    | 0.99    | 1.16    | 0.00    | 1.07    | 0.00    | 3.09    | 0.00    | 0.59    | 0.74    | 0.00    | 0.00    | 0.89    | 1.25    | 1.47    | 0.30    | 0.00    | 0.00    | 0.00    | 0.00     | 0.00     | 0.00     | 0.00     | 0.00 |      |      |
| OTU_ARG92      | AMINOGLYCOSIDE | AMINOGLYCOSIDE                                | aac(6)-I1, aac(6)-I1a                  | 555    | 8.07                         | 0.21    | 0.90    | 0.00    | 0.00    | 0.15    | 0.00    | 0.00    | 0.00    | 0.00    | 0.27    | 0.83    | 0.00    | 0.48    | 0.00    | 0.49    | 0.00    | 0.12    | 0.80    | 0.79    | 0.00    | 0.56    | 0.00    | 0.00    | 0.89    | 0.00    | 0.48    | 0.30    | 0.00    | 0.00    | 0.00    | 0.00    | 0.00     | 0.00     | 0.00     | 0.00     |      |      |      |
| OTU_ARG108     | AMINOGLYCOSIDE | STREPTOMYCIN                                  | aadA                                   | 798    | 7.89                         | 0.25    | 0.00    | 1.15    | 0.76    | 0.00    | 0.00    | 0.23    | 0.32    | 0.99    | 0.00    | 0.14    | 0.22    | 0.68    | 0.00    | 0.14    | 0.00    | 0.00    | 0.16    | 0.00    | 0.00    | 0.00    | 0.00    | 0.00    | 0.64    | 0.89    | 0.00    | 0.44    | 0.00    | 0.00    | 0.00    | 0.00    | 0.00     | 0.00     | 0.00     |          |      |      |      |
| OTU_ARG89      | AMINOGLYCOSIDE | STREPTOMYCIN                                  | aadA13, aph37-1a                       | 798    | 5.82                         | 0.00    | 0.75    | 0.00    | 0.24    | 0.00    | 0.00    | 0.00    | 0.09    | 0.00    | 0.00    | 0.33    | 0.00    | 0.00    | 0.00    | 0.32    | 0.46    | 0.55    | 0.00    | 0.58    | 0.00    | 0.00    | 0.00    | 0.96    | 0.12    | 0.52    | 0.00    | 0.88    | 0.00    | 0.00    | 0.00    | 0.00    | 0.00     | 0.00     | 0.00     |          |      |      |      |
| OTU_ARG39      | AMINOGLYCOSIDE | GENTAMICIN/KANAMYCIN                          | Cfaac(6)-Ic                            | 582    | 5.88                         | 0.10    | 0.00    | 2.30    | 0.11    | 0.14    | 0.00    | 0.00    | 0.00    | 0.00    | 0.00    | 0.00    | 0.00    | 0.00    | 0.00    | 0.00    | 0.00    | 0.00    | 0.00    | 0.00    | 0.00    | 0.00    | 0.00    | 1.63    | 0.00    | 0.47    | 0.14    | 0.00    | 0.00    | 0.00    | 0.00    | 0.00    | 0.00     | 0.00     |          |          |      |      |      |
| OTU_ARG16      | AMINOGLYCOSIDE | Gentamicin, Streptomycin, aph37-1b, aac(6)-Ic | 1392                                   | 4.32   | 0.12                         | 0.00    | 0.77    | 0.05    | 0.12    | 0.49    | 0.00    | 0.00    | 0.22    | 0.66    | 0.00    | 0.09    | 0.15    | 0.20    | 0.00    | 0.09    | 0.05    | 0.21    | 0.00    | 0.11    | 0.14    | 0.00    | 0.00    | 0.50    | 0.20    | 0.00    | 0.15    | 0.00    | 0.00    | 0.00    | 0.00    | 0.00    | 0.00     | 0.00     | 0.00     |          |      |      |      |
| OTU_ARG104     | AMINOGLYCOSIDE | GENTAMICIN/KANAMYCIN                          | Cfaac(6)-Ic                            | 534    | 4.11                         | 0.22    | 0.00    | 0.36    | 0.00    | 0.00    | 0.00    | 0.00    | 0.14    | 0.00    | 0.00    | 0.00    | 0.37    | 0.25    | 0.00    | 0.00    | 0.00    | 0.00    | 0.00    | 0.25    | 0.00    | 0.00    | 0.00    | 0.18    | 1.29    | 0.00    | 0.00    | 0.00    | 0.00    | 0.00    | 0.00    | 0.00    | 0.00     | 0.00     |          |          |      |      |      |
| OTU_ARG58      | AMINOGLYCOSIDE | STREPTOMYCIN                                  | aadA6                                  | 846    | 3.75                         | 0.00    | 0.00    | 0.00    | 0.20    | 0.00    | 0.00    | 0.26    | 0.00    | 0.00    | 0.76    | 0.00    | 0.00    | 0.00    | 0.00    | 0.76    | 0.00    | 0.00    | 0.00    | 0.00    | 0.00    | 0.00    | 0.00    | 0.17    | 0.73    | 0.00    | 0.00    | 0.00    | 0.00    | 0.00    | 0.00    | 0.00    | 0.00     | 0.00     |          |          |      |      |      |
| OTU_ARG56      | AMINOGLYCOSIDE | KANAMYCIN                                     | aph(3)-Ia                              | 816    | 3.60                         | 0.28    | 0.00    | 0.00    | 0.00    | 0.00    | 0.00    | 0.00    | 0.00    | 0.00    | 0.00    | 0.16    | 0.38    | 0.34    | 0.00    | 0.34    | 0.00    | 0.24    | 0.18    | 0.00    | 0.00    | 0.00    | 0.00    | 0.00    | 0.24    | 0.34    | 0.00    | 0.91    | 0.00    | 0.00    | 0.00    | 0.00    | 0.53     | 0.00     |          |          |      |      |      |
| OTU_ARG122     | AMINOGLYCOSIDE | AMINOGLYCOSIDE                                | aac(6)-29, aac(6)-29a, ai              | 404    | 3.51                         | 0.00    | 0.00    | 0.00    | 0.00    | 0.00    | 0.00    | 0.00    | 0.00    | 0.37    | 0.00    | 0.00    | 0.33    | 0.26    | 0.68    | 0.00    | 0.32    | 0.18    | 0.73    | 0.00    | 0.00    | 0.00    | 0.00    | 0.24    | 0.00    | 0.00    | 0.41    | 0.00    | 0.00    | 0.00    | 0.00    | 0.00    | 0.00     | 0.00     |          |          |      |      |      |
| OTU_ARG58      | AMINOGLYCOSIDE | STREPTOMYCIN                                  | aadA                                   | 807    | 2.38                         | 0.00    | 0.23    | 0.62    | 0.00    | 0.00    | 0.00    | 0.00    | 0.00    | 0.00    | 0.00    | 0.00    | 0.24    | 0.32    | 0.00    | 0.24    | 0.32    | 0.00    | 0.15    | 0.09    | 0.00    | 0.18    | 0.00    | 0.00    | 0.23    | 0.32    | 0.00    | 0.05    | 0.00    | 0.00    | 0.00    | 0.00    | 0.00     | 0.00     |          |          |      |      |      |
| OTU_ARG73      | AMINOGLYCOSIDE | STREPTOMYCIN                                  | ant(4)-Ib, aac(6)-Ic                   | 798    | 2.31                         | 0.00    | 0.00    | 0.00    | 0.00    | 0.00    | 0.00    | 0.00    | 0.00    | 0.00    | 0.00    | 0.00    | 0.00    | 0.00    | 0.00    | 0.00    | 0.00    | 0.00    | 0.00    | 0.00    | 0.00    | 0.00    | 0.00    | 0.00    | 0.00    | 0.00    | 0.00    | 0.00    | 0.00    | 0.00    | 0.00    | 0.00    | 0.00     | 0.00     | 0.00     |          |      |      |      |
| OTU_ARG76      | AMINOGLYCOSIDE | STREPTOMYCIN                                  | aadA10                                 | 834    | 2.37                         | 0.00    | 0.00    | 0.00    | 0.00    | 0.00    | 0.00    | 0.00    | 0.00    | 0.00    | 0.00    | 0.00    | 0.00    | 0.00    | 0.00    | 0.00    | 0.00    | 0.00    | 0.00    | 0.00    | 0.00    | 0.00    | 0.00    | 0.00    | 0.00    | 0.00    | 0.00    | 0.00    | 0.00    | 0.00    | 0.00    | 0.00    | 0.00     | 0.00     | 0.00     |          |      |      |      |
| OTU_ARG65      | AMINOGLYCOSIDE | GENTAMICIN/KANAMYCIN                          | Cfaac(6)-Ib                            | 555    | 2.31                         | 0.41    | 0.36    | 0.00    | 0.15    | 0.00    | 0.00    | 0.00    | 0.00    | 0.00    | 0.00    | 0.00    | 0.00    | 0.00    | 0.00    | 0.00    | 0.00    | 0.23    | 0.27    | 0.00    | 0.00    | 0.00    | 0.00    | 0.00    | 0.00    | 0.00    | 0.00    | 0.00    | 0.00    | 0.00    | 0.00    | 0.00    | 0.00     | 0.00     | 0.00     |          |      |      |      |
| OTU_ARG70      | AMINOGLYCOSIDE | AMIKACIN/KANAMYCIN                            | aph(3)-Ib                              | 795    | 2.08                         | 0.00    | 0.00    | 0.00    | 0.00    | 0.00    | 0.00    | 0.00    | 0.00    | 0.00    | 0.00    | 0.00    | 0.00    | 0.00    | 0.00    | 0.00    | 0.00    | 0.16    | 0.19    | 0.00    | 0.00    | 0.00    | 0.00    | 0.38    | 0.00    | 0.00    | 0.00    | 0.00    | 0.00    | 0.00    | 0.00    | 0.00    | 0.00     | 0.00     |          |          |      |      |      |
| OTU_ARG76      | AMINOGLYCOSIDE | AMIKACIN/KANAMYCIN                            | aph(3)-IV                              | 795    | 1.32                         | 0.07    | 0.00    | 0.00    | 0.00    | 0.00    | 0.00    | 0.00    | 0.00    | 0.00    | 0.00    | 0.00    | 0.00    | 0.00    | 0.00    | 0.00    | 0.00    | 0.00    | 0.00    | 0.00    | 0.00    | 0.00    | 0.00    | 0.00    | 0.00    | 0.00    | 0.00    | 0.00    | 0.00    | 0.00    | 0.00    | 0.00    | 0.00     | 0.00     |          |          |      |      |      |
| OTU_ARG34      | AMINOGLYCOSIDE | STREPTOMYCIN                                  | ant(6)-Ia                              | 909    | 1.22                         | 0.00    | 0.00    | 0.59    | 0.00    | 0.00    | 0.00    | 0.00    | 0.00    | 0.00    | 0.00    | 0.00    | 0.00    | 0.00    | 0.00    | 0.00    | 0.00    | 0.00    | 0.00    | 0.00    | 0.00    | 0.00    | 0.00    | 0.00    | 0.15    | 0.00    | 0.09    | 0.00    | 0.00    | 0.00    | 0.00    | 0.00    | 0.00     |          |          |          |      |      |      |
| OTU_ARG70      | AMINOGLYCOSIDE | KANAMYCIN                                     | aph(3)-Ia                              | 795    | 1.19                         | 0.00    | 0.00    | 0.00    | 0.00    | 0.00    | 0.00    | 0.00    | 0.00    | 0.00    | 0.00    | 0.00    | 0.00    | 0.00    | 0.00    | 0.00    | 0.00    | 0.00    | 0.00    | 0.00    | 0.00    | 0.00    | 0.00    | 0.00    | 0.00    | 0.00    | 0.00    | 0.00    | 0.00    | 0.00    | 0.00    | 0.00    | 0.00     | 0.00     |          |          |      |      |      |
| OTU_ARG59      | AMINOGLYCOSIDE | AMINOGLYCOSIDE                                | aadA                                   | 516    | 1.15                         | 0.00    | 0.00    | 0.00    | 0.00    | 0.00    | 0.00    | 0.00    | 0.00    | 0.00    | 0.00    | 0.00    | 0.00    | 0.00    | 0.00    | 0.00    | 0.00    | 0.00    | 0.00    | 0.00    | 0.00    | 0.00    | 0.00    | 0.00    | 0.00    | 0.00    | 0.00    | 0.00    | 0.00    | 0.00    | 0.00    | 0.00    | 0.00     | 0.00     |          |          |      |      |      |
| OTU_ARG19      | AMINOGLYCOSIDE | STREPTOMYCIN                                  | ant(4)-Ib, aac(6)-Ic                   | 789    | 0.96                         | 0.07    | 0.00    | 0.00    | 0.00    | 0.00    | 0.00    | 0.00    | 0.10    | 0.00    | 0.00    | 0.00    | 0.00    | 0.00    | 0.00    | 0.00    | 0.00    | 0.00    | 0.00    | 0.00    | 0.00    | 0.00    | 0.00    | 0.00    | 0.00    | 0.25    | 0.35    | 0.10    | 0.00    | 0.00    | 0.00    | 0.00    | 0.00     |          |          |          |      |      |      |
| OTU_ARG72      | AMINOGLYCOSIDE | STREPTOMYCIN                                  | ant(4)-Ib, aac(6)-Ic                   | 789    | 0.93                         | 0.36    | 0.00    | 0.33    | 0.11    | 0.00    | 0.00    | 0.00    | 0.00    | 0.00    | 0.00    | 0.00    | 0.00    | 0.00    | 0.00    | 0.00    | 0.00    | 0.00    | 0.00    | 0.00    | 0.00    | 0.00    | 0.00    | 0.00    | 0.00    | 0.00    | 0.00    | 0.00    | 0.00    | 0.00    | 0.00    | 0.00    | 0.00     | 0.00     |          |          |      |      |      |
| OTU_ARG101     | AMINOGLYCOSIDE | AMIKACIN/KANAMYCIN                            |                                        |        |                              |         |         |         |         |         |         |         |         |         |         |         |         |         |         |         |         |         |         |         |         |         |         |         |         |         |         |         |         |         |         |         |          |          |          |          |      |      |      |
